# Supplementary material
Source: PubMed Central journal article supplement (PMC2649963)
Supplement: NIHMS77162-supplement-01.pdf [file NIHMS77162-supplement-01.pdf]

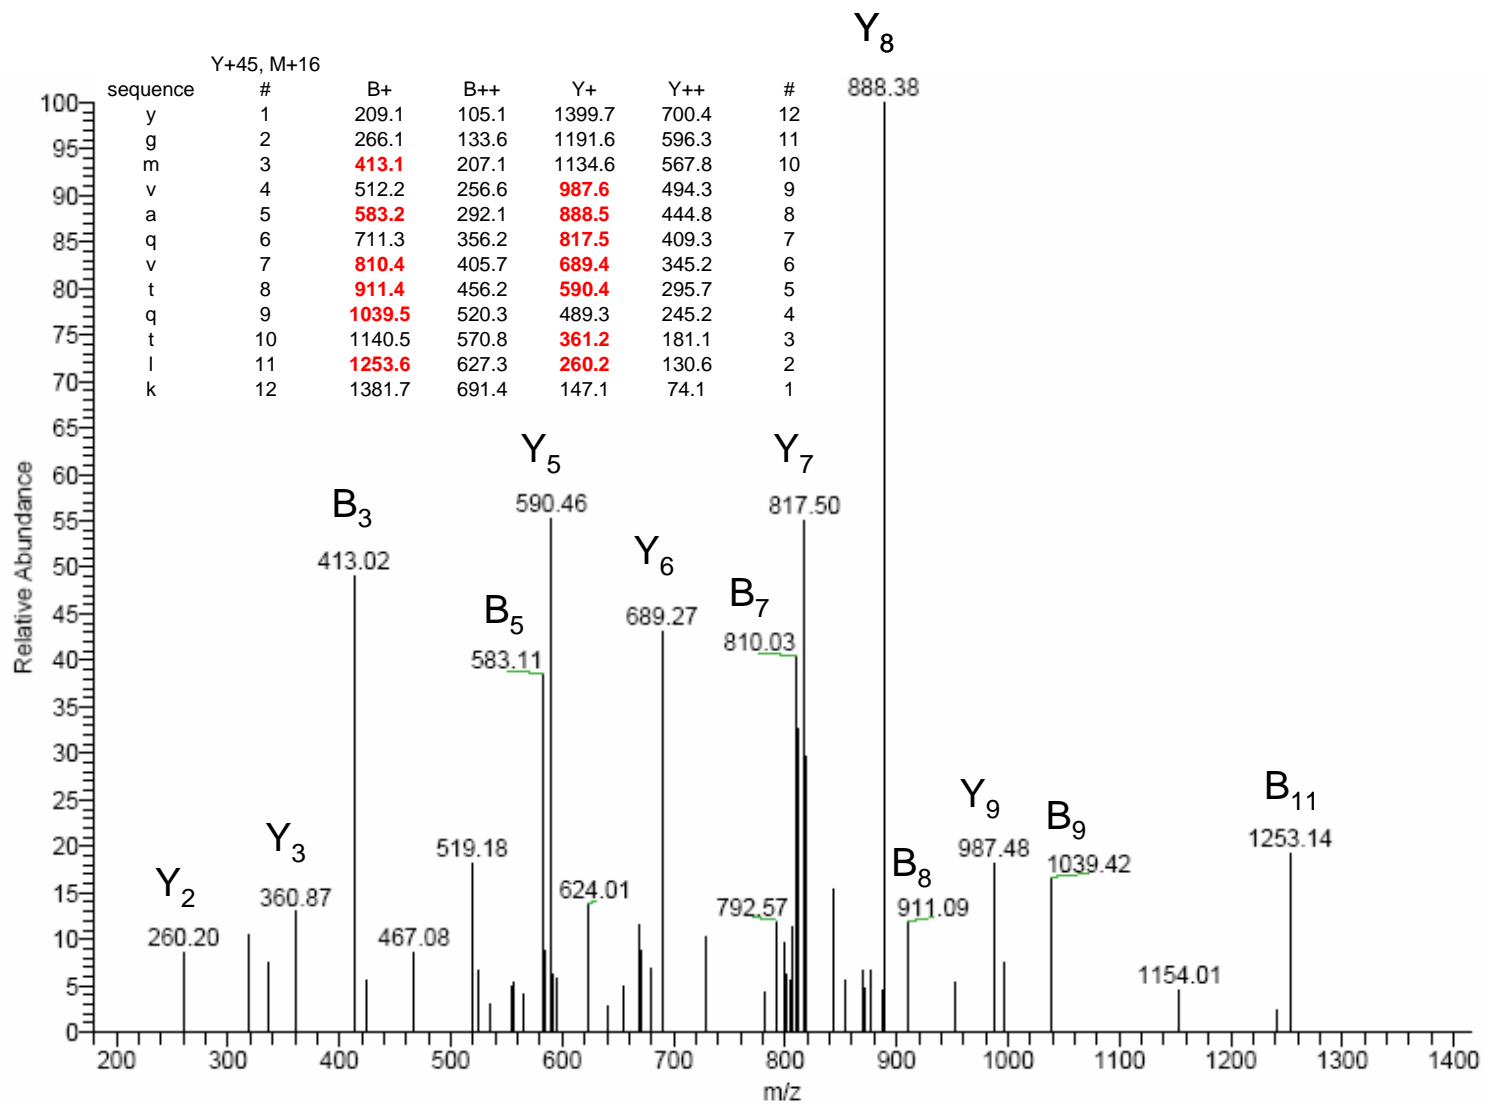

Figure 1: MS/MS spectrum of nitrated peptide obtained from *in vivo* LDL<sup>-</sup> apoB-100 protein. Mass of peptides observed is in red upon ionization and annotated on the chart. Spectra were obtained from bioworks browser.

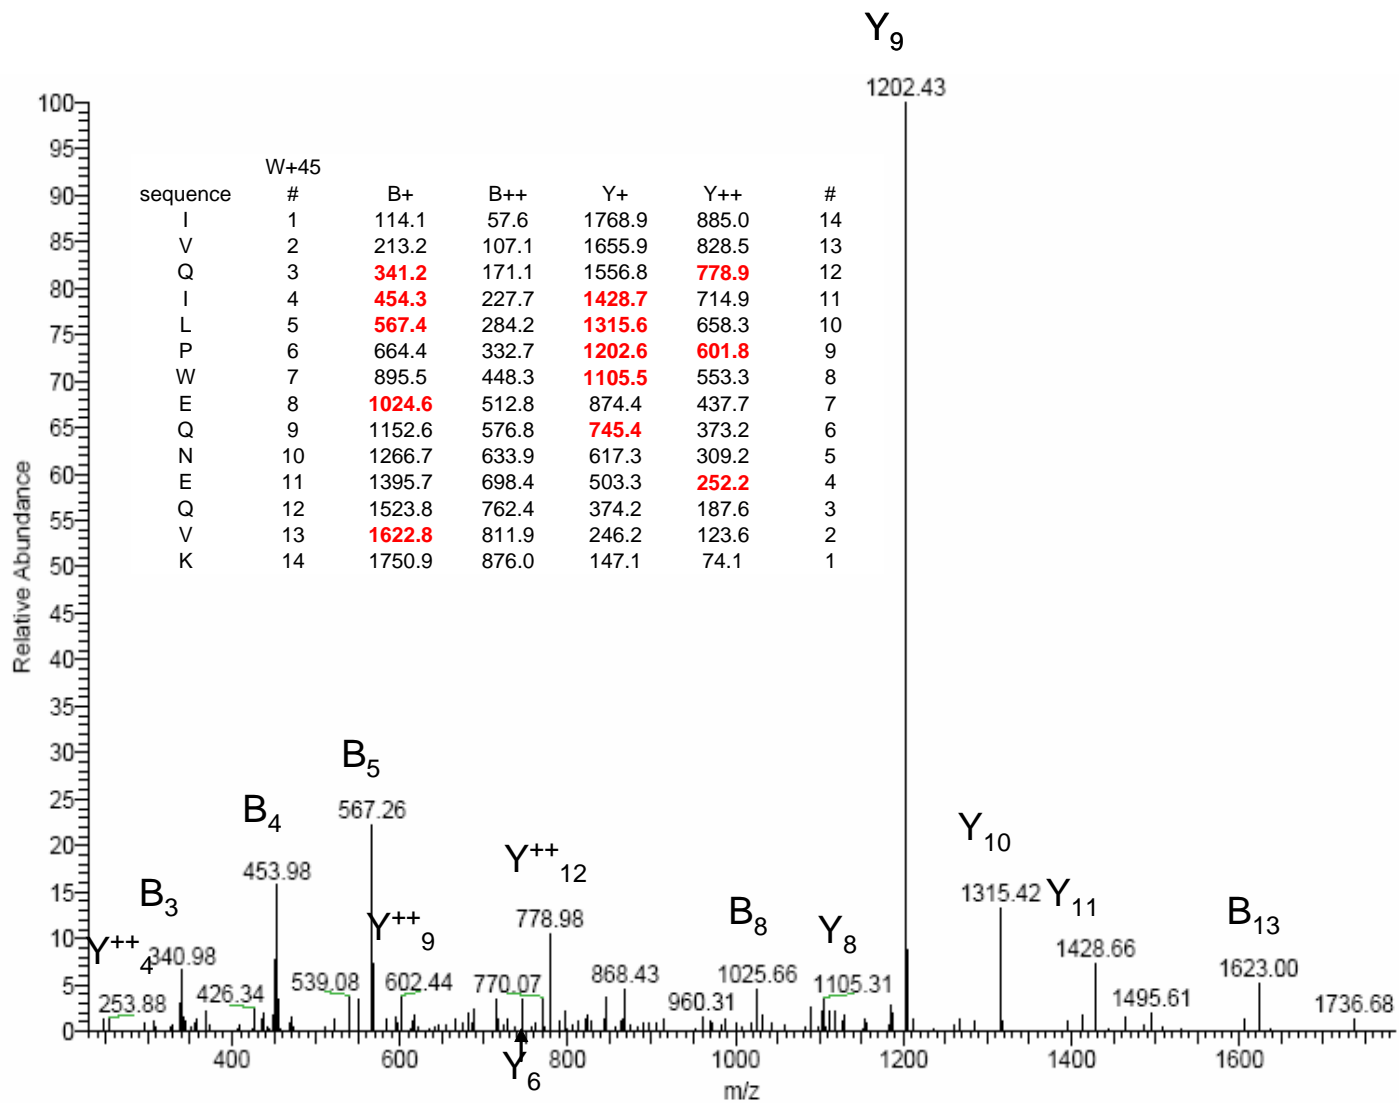

Figure 2: MS/MS spectrum of nitrated peptide obtained from *in vivo* LDL<sup>-</sup> apoB-100 protein. Mass of peptides observed is in red upon ionization and annotated on the chart. Spectra were obtained from bioworks browser.

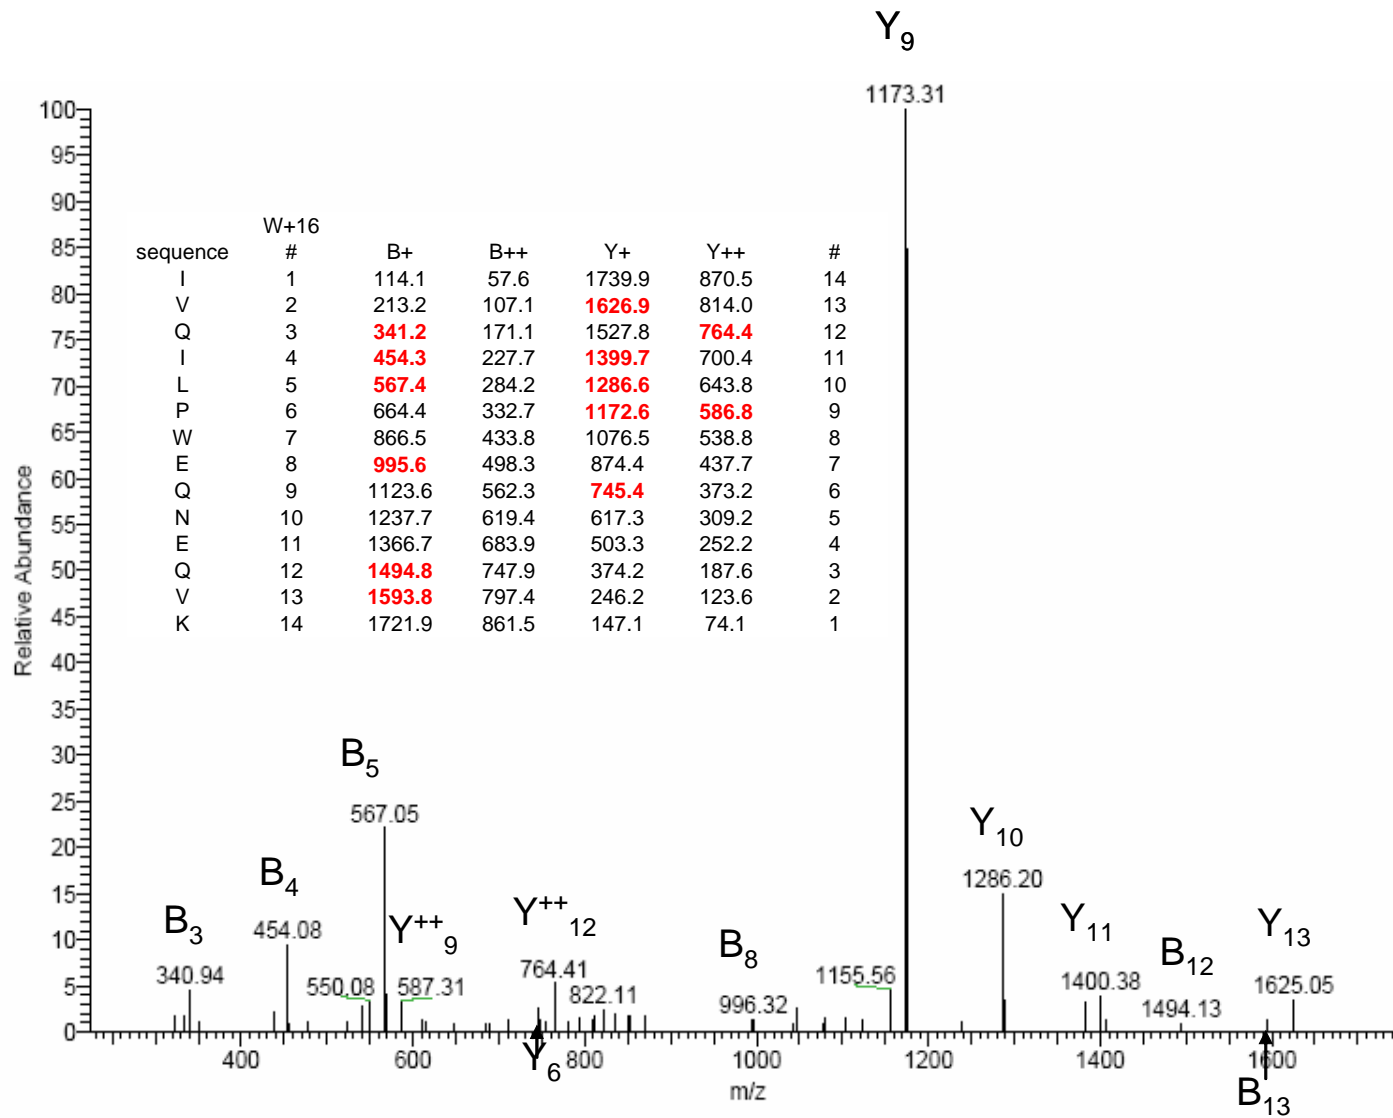

Figure 3: MS/MS spectrum of nitrated peptide obtained from *in vivo* LDL<sup>-</sup> apoB-100 protein. Mass of peptides observed is in red upon ionization and annotated on the chart. Spectra were obtained from bioworks browser.

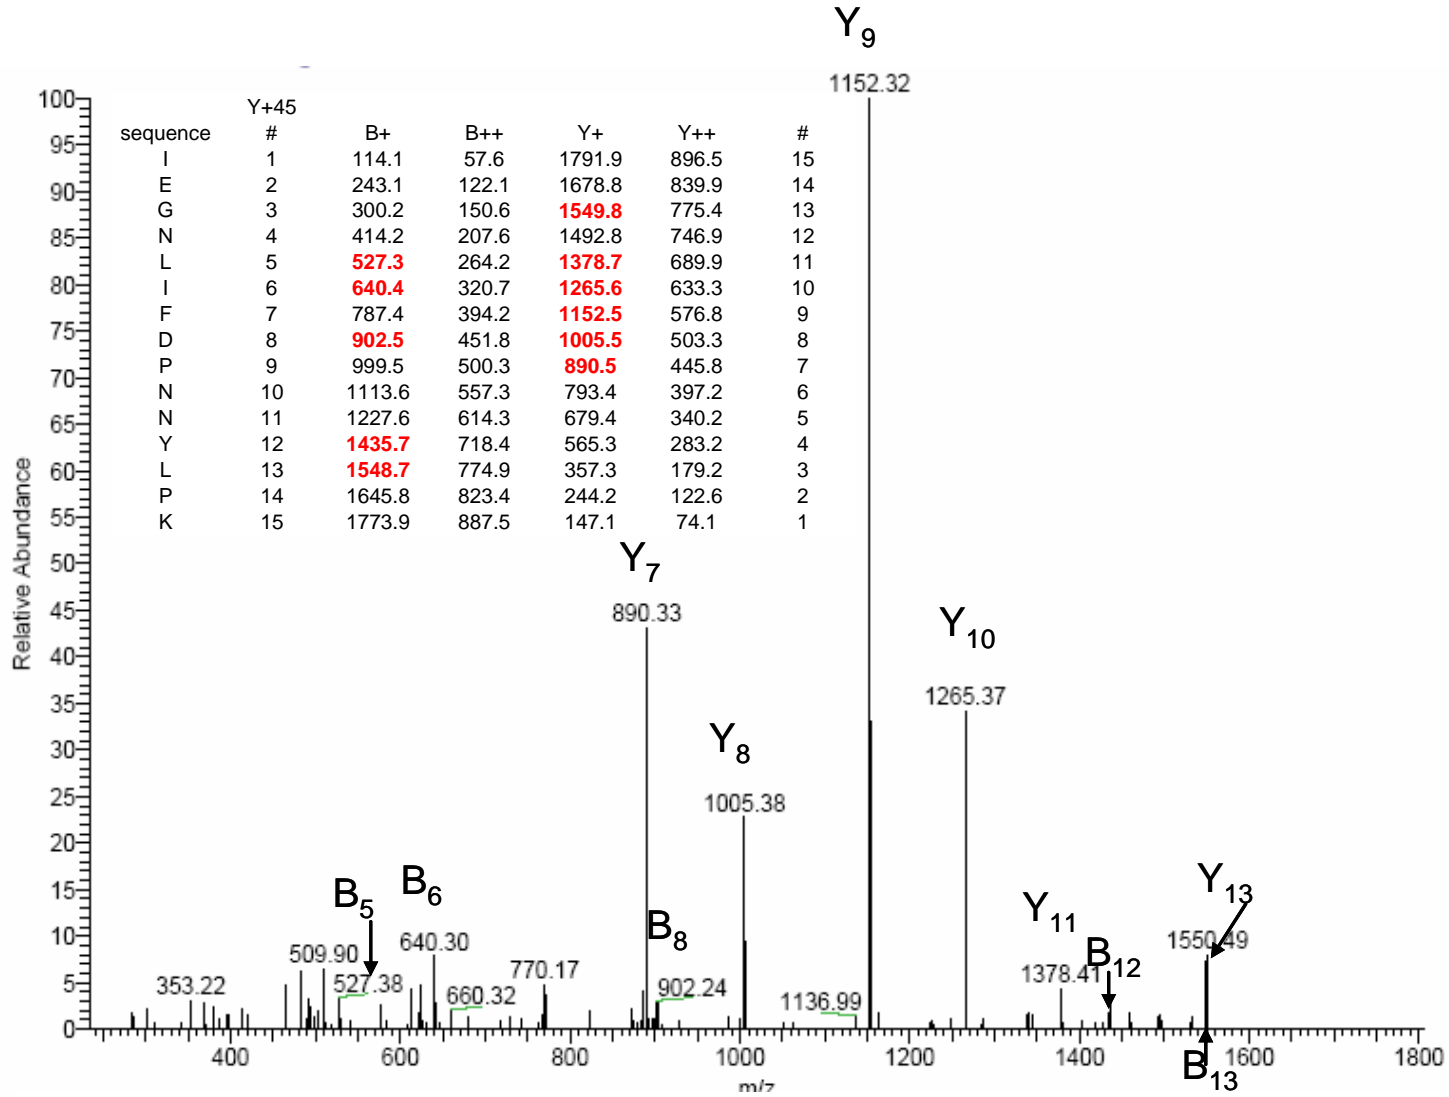

Figure 4: MS/MS spectrum of nitrated peptide obtained from *in vivo* LDL<sup>-</sup> apoB-100 protein. Mass of peptides observed is in red upon ionization and annotated on the chart. Spectra were obtained from bioworks browser.

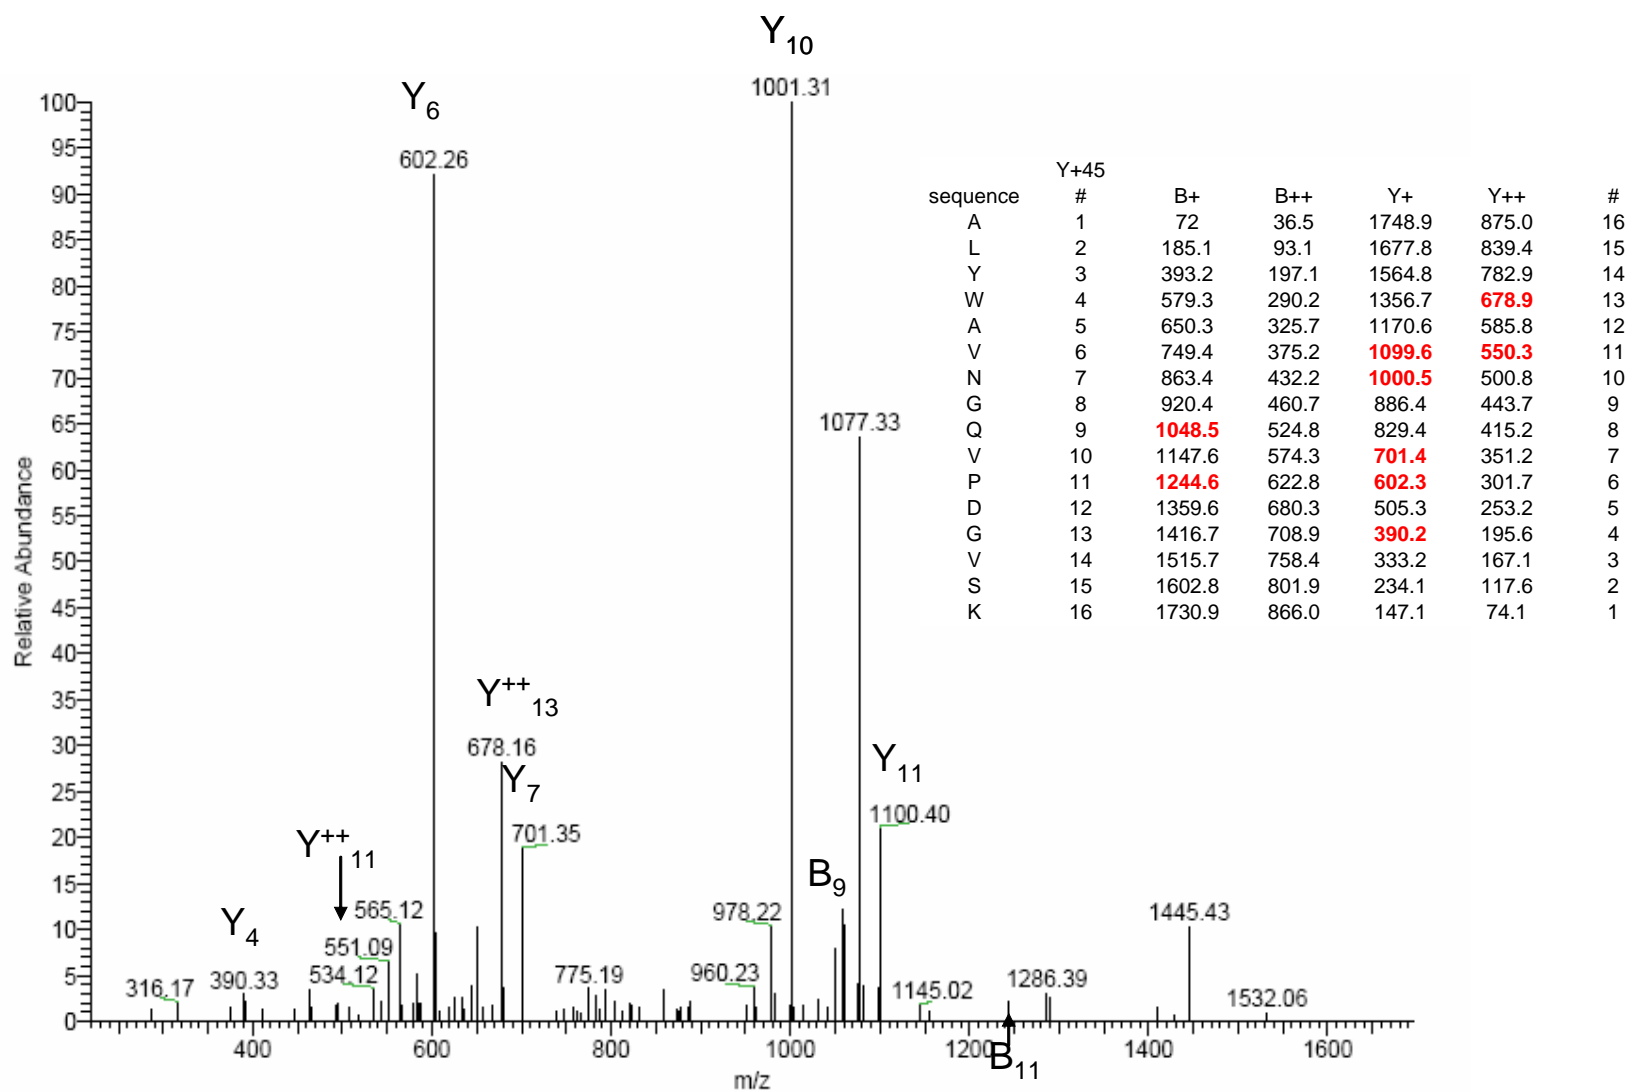

Figure 5: MS/MS spectrum of nitrated peptide obtained from *in vivo* LDL<sup>-</sup> apoB-100 protein. Mass of peptides observed is in red upon ionization and annotated on the chart. Spectra were obtained from bioworks browser.

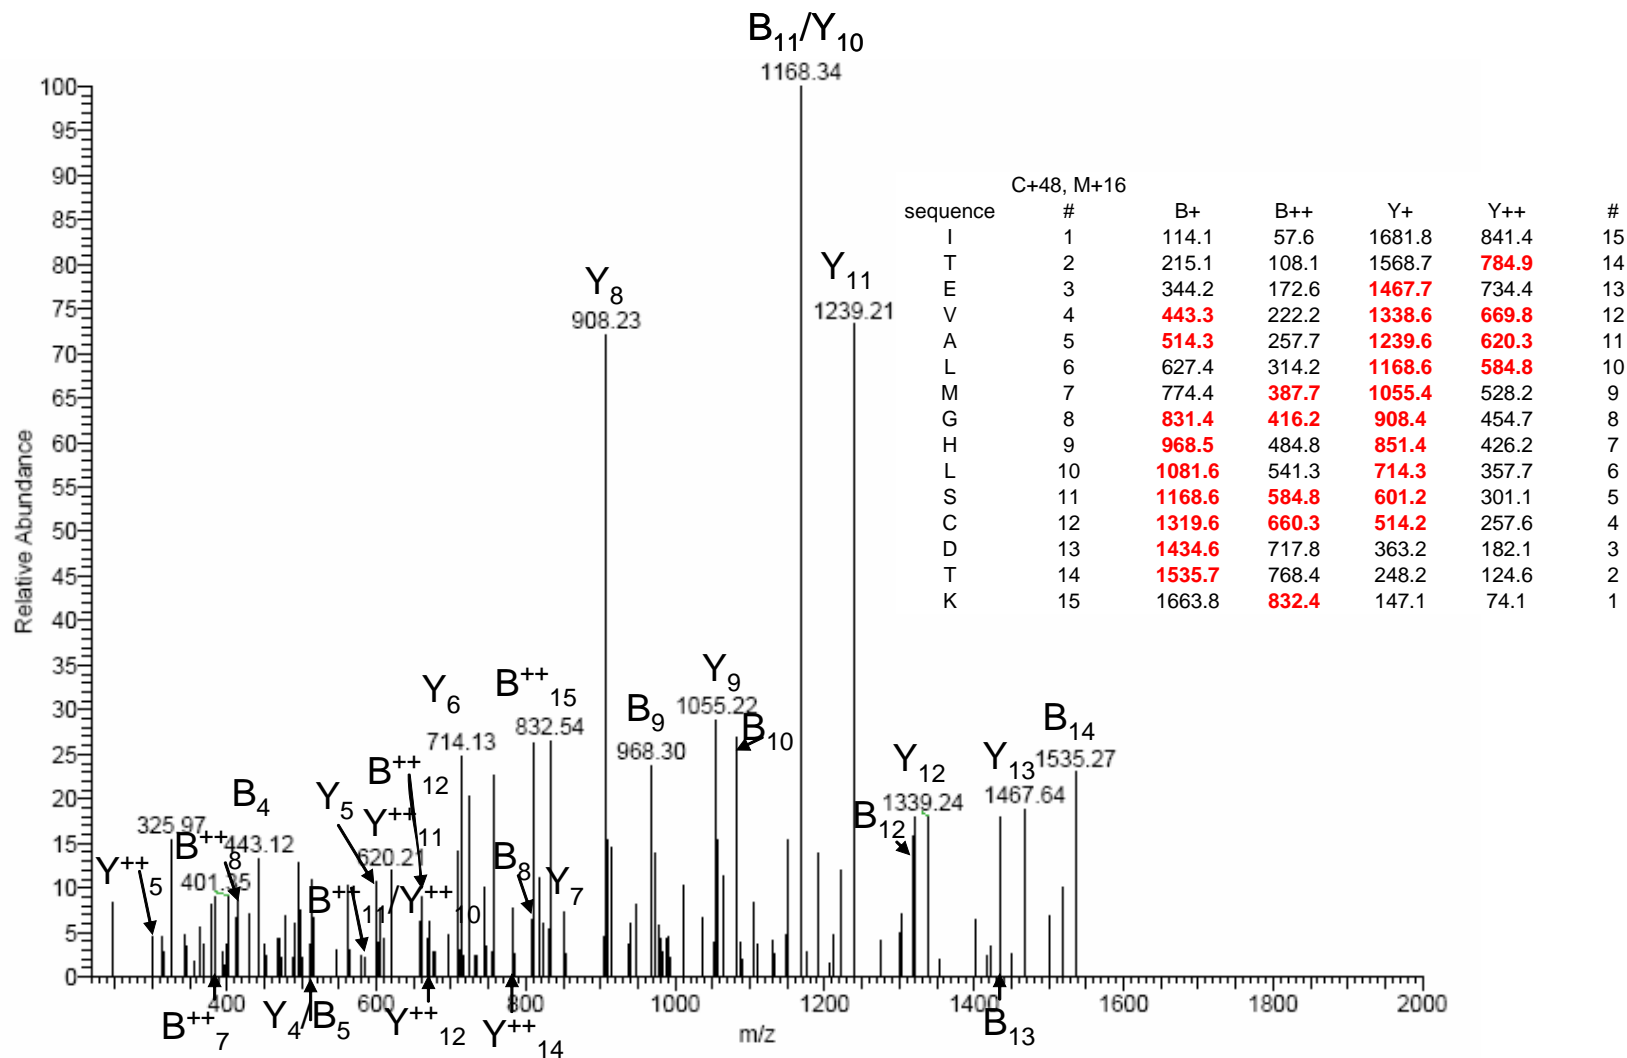

Figure 6: MS/MS spectrum of nitrated peptide obtained from *in vivo* LDL<sup>-</sup> apoB-100 protein. Mass of peptides observed is in red upon ionization and annotated on the chart. Spectra were obtained from bioworks browser.

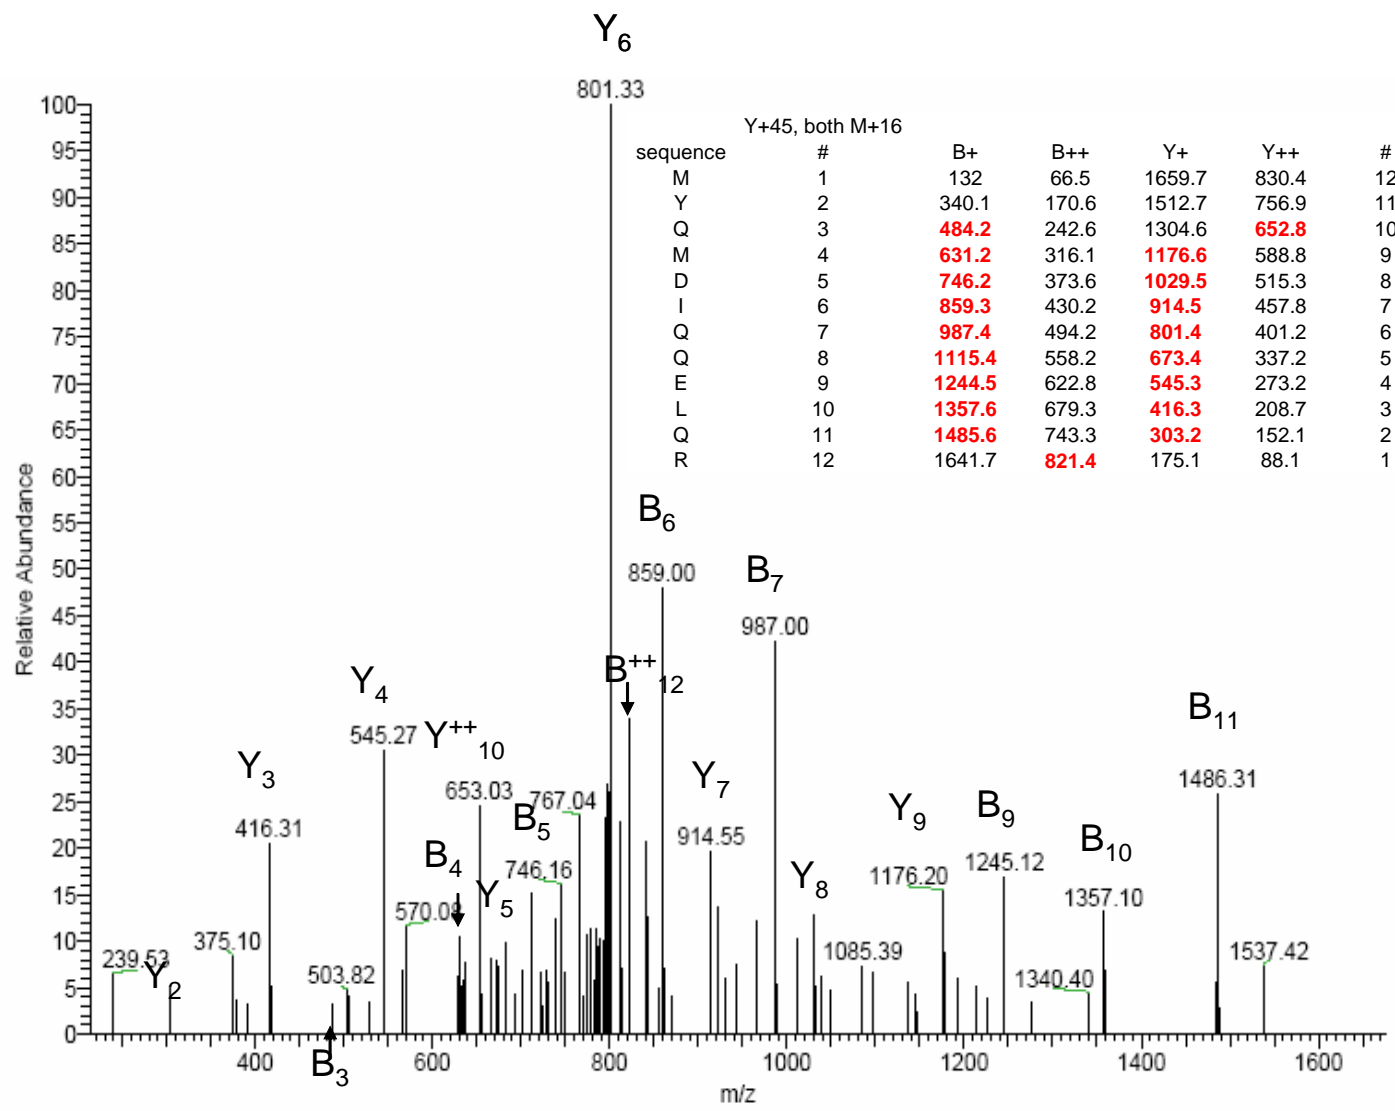

Figure 7: MS/MS spectrum of nitrated peptide obtained from *in vivo* LDL apoB-100 protein. Mass of peptides observed is in red upon ionization and annotated on the chart. Spectra were obtained from bioworks browser.

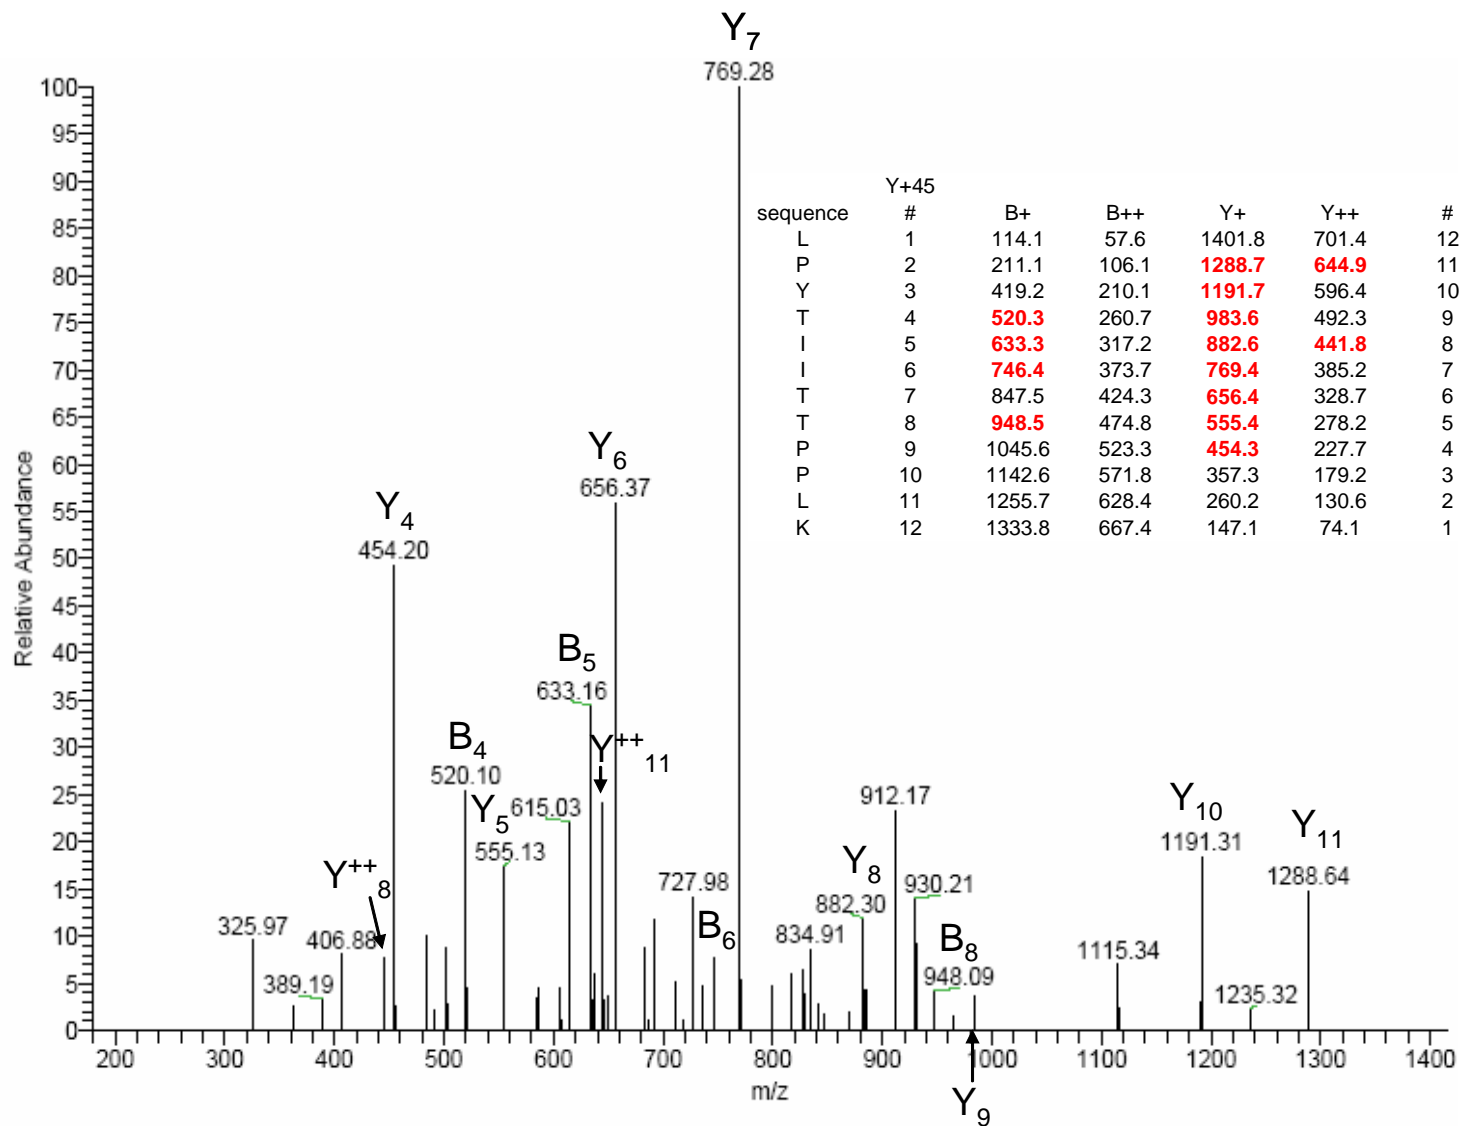

Figure 8: MS/MS spectrum of nitrated peptide obtained from *in vivo* LDL<sup>-</sup> apoB-100 protein. Mass of peptides observed is in red upon ionization and annotated on the chart. Spectra were obtained from bioworks browser.



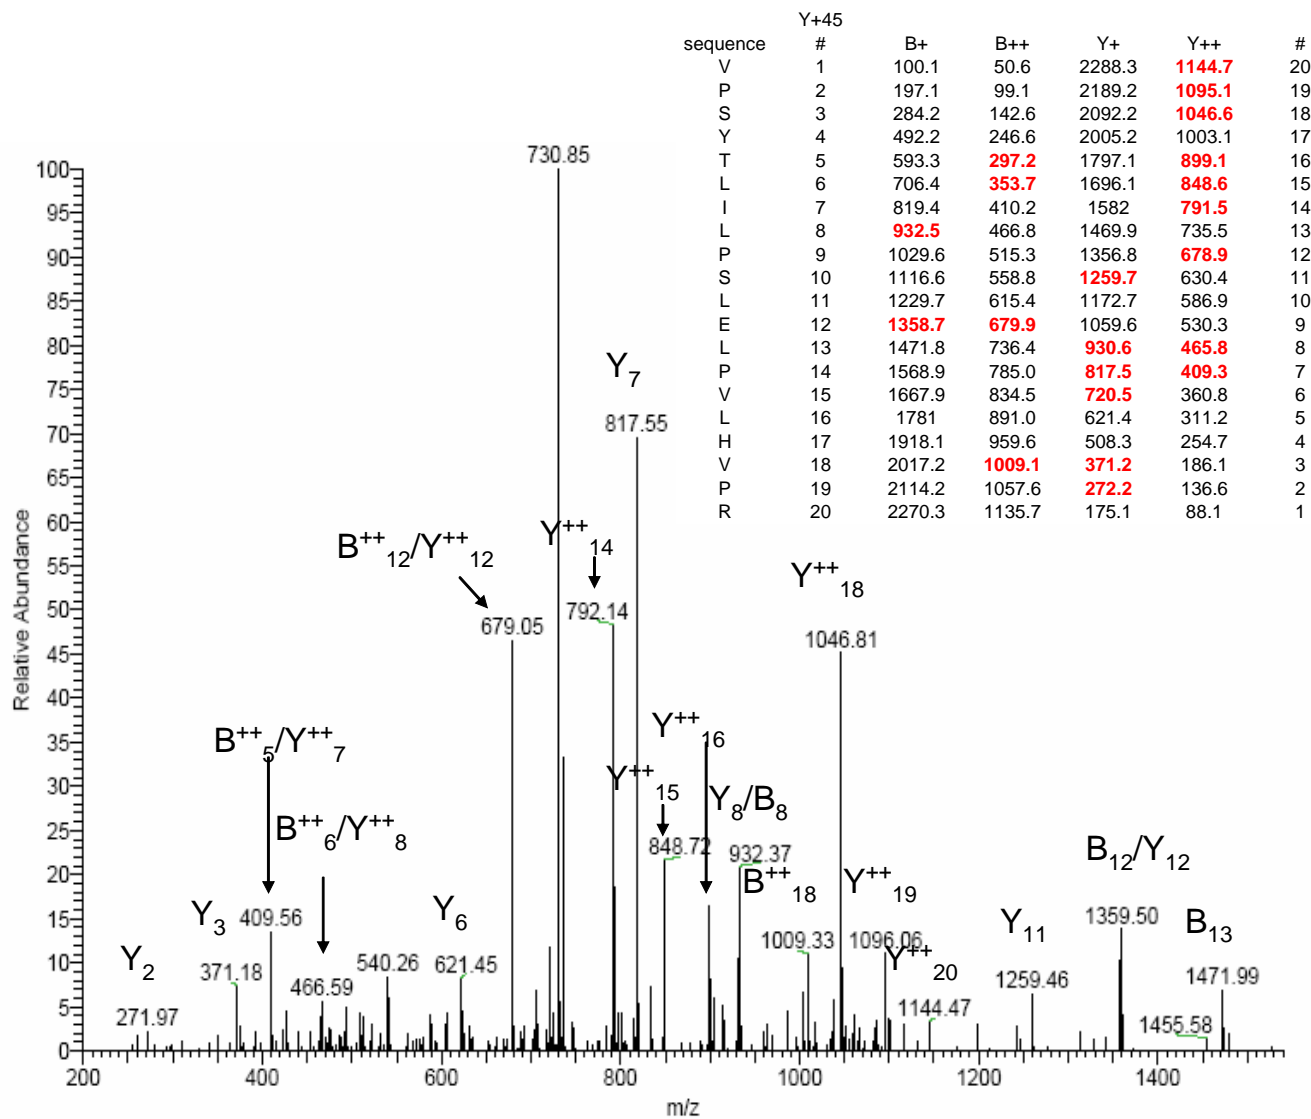

Figure 9: MS/MS spectrum of nitrated peptide obtained from *in vivo* LDL<sup>-</sup> apoB-100 protein. Mass of peptides observed is in red upon ionization and annotated on the chart. Spectra were obtained from bioworks browser.

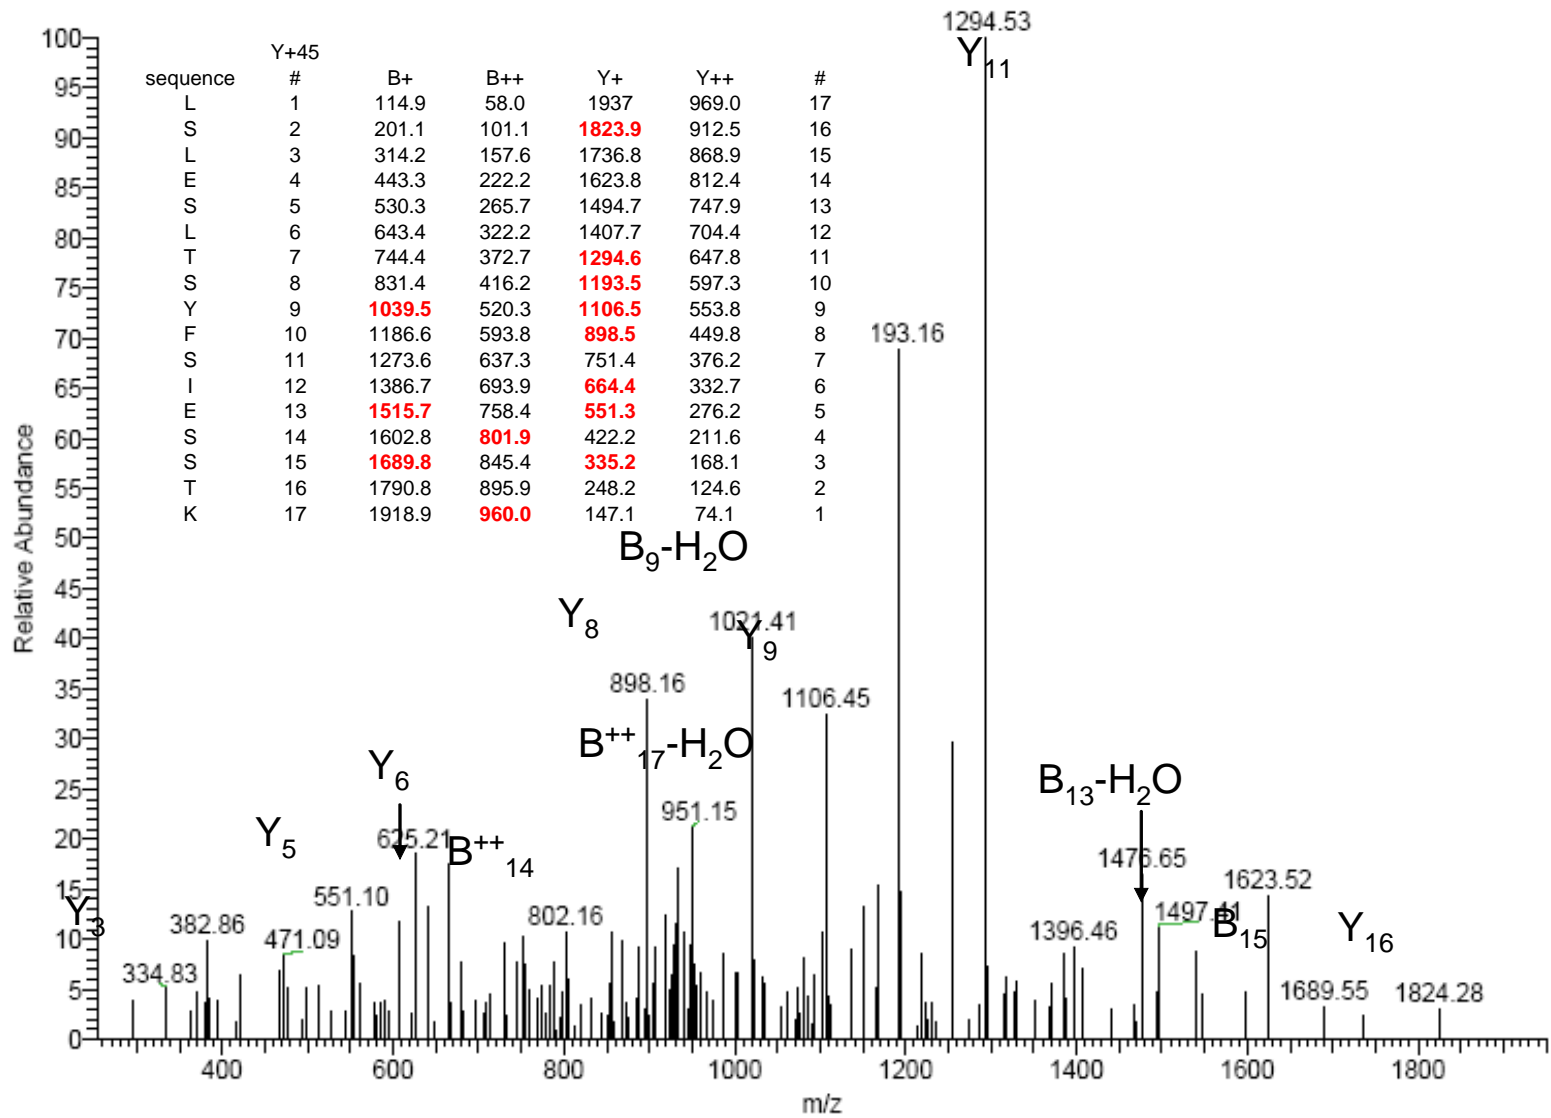

Figure 10: MS/MS spectrum of nitrated peptide obtained from *in vivo* LDL<sup>-</sup> apoB-100 protein. Mass of peptides observed is in red upon ionization and annotated on the chart. Spectra were obtained from bioworks browser.

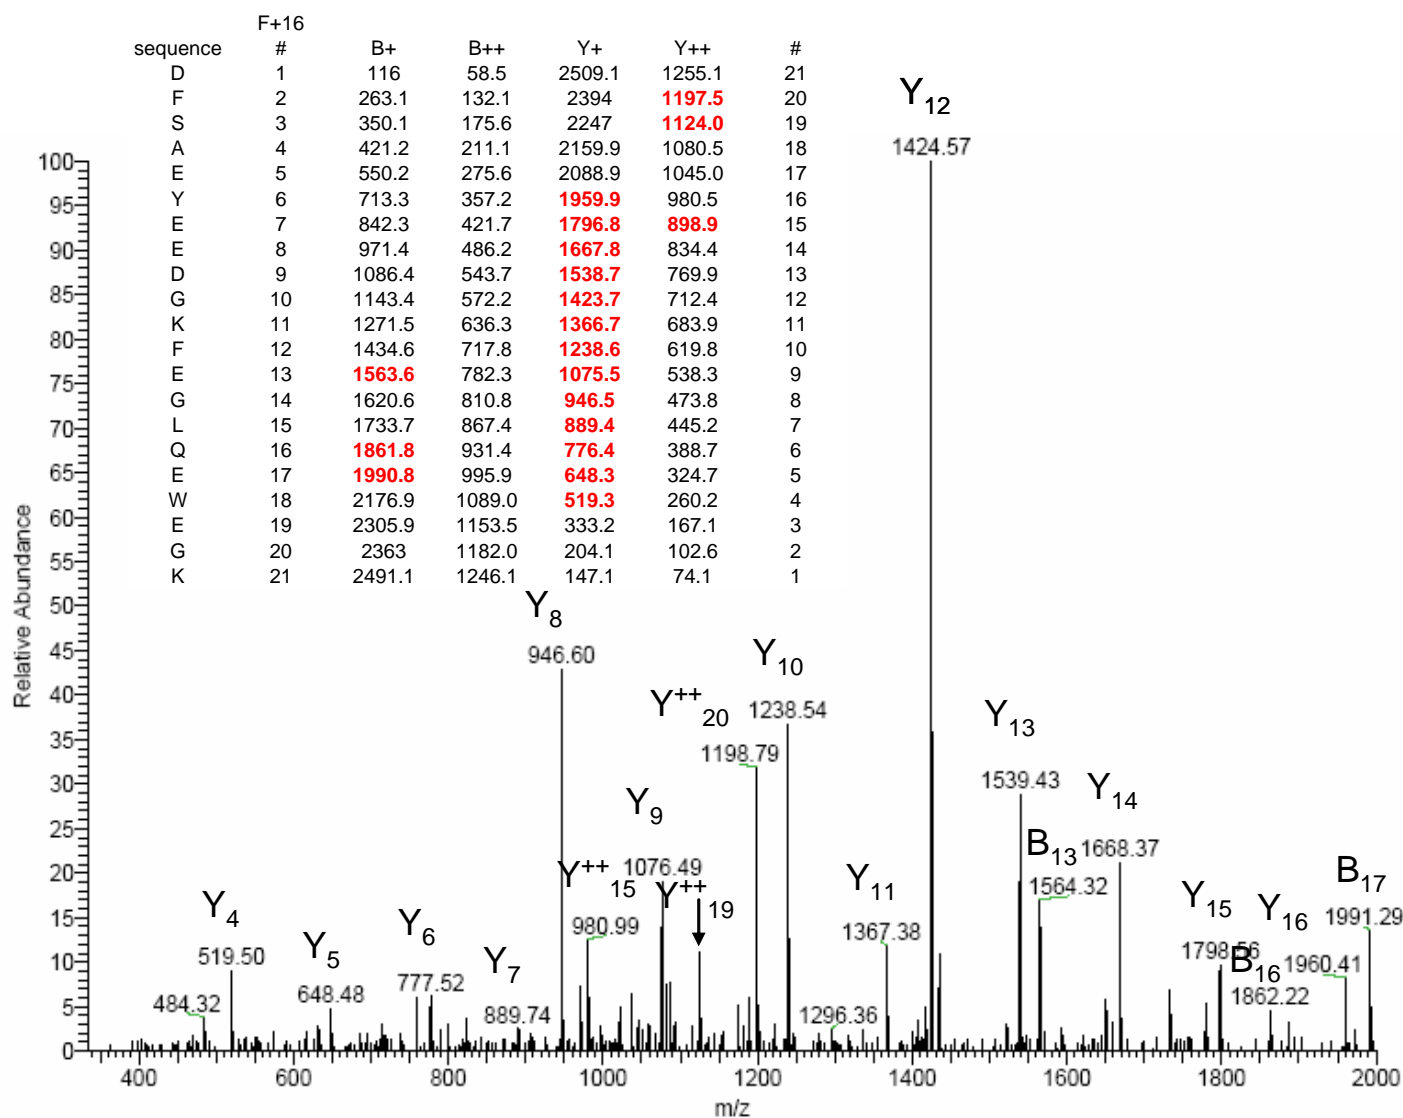

Figure 11: MS/MS spectrum of nitrated peptide obtained from *in vivo* LDL<sup>-</sup> apoB-100 protein. Mass of peptides observed is in red upon ionization and annotated on the chart. Spectra were obtained from bioworks browser.

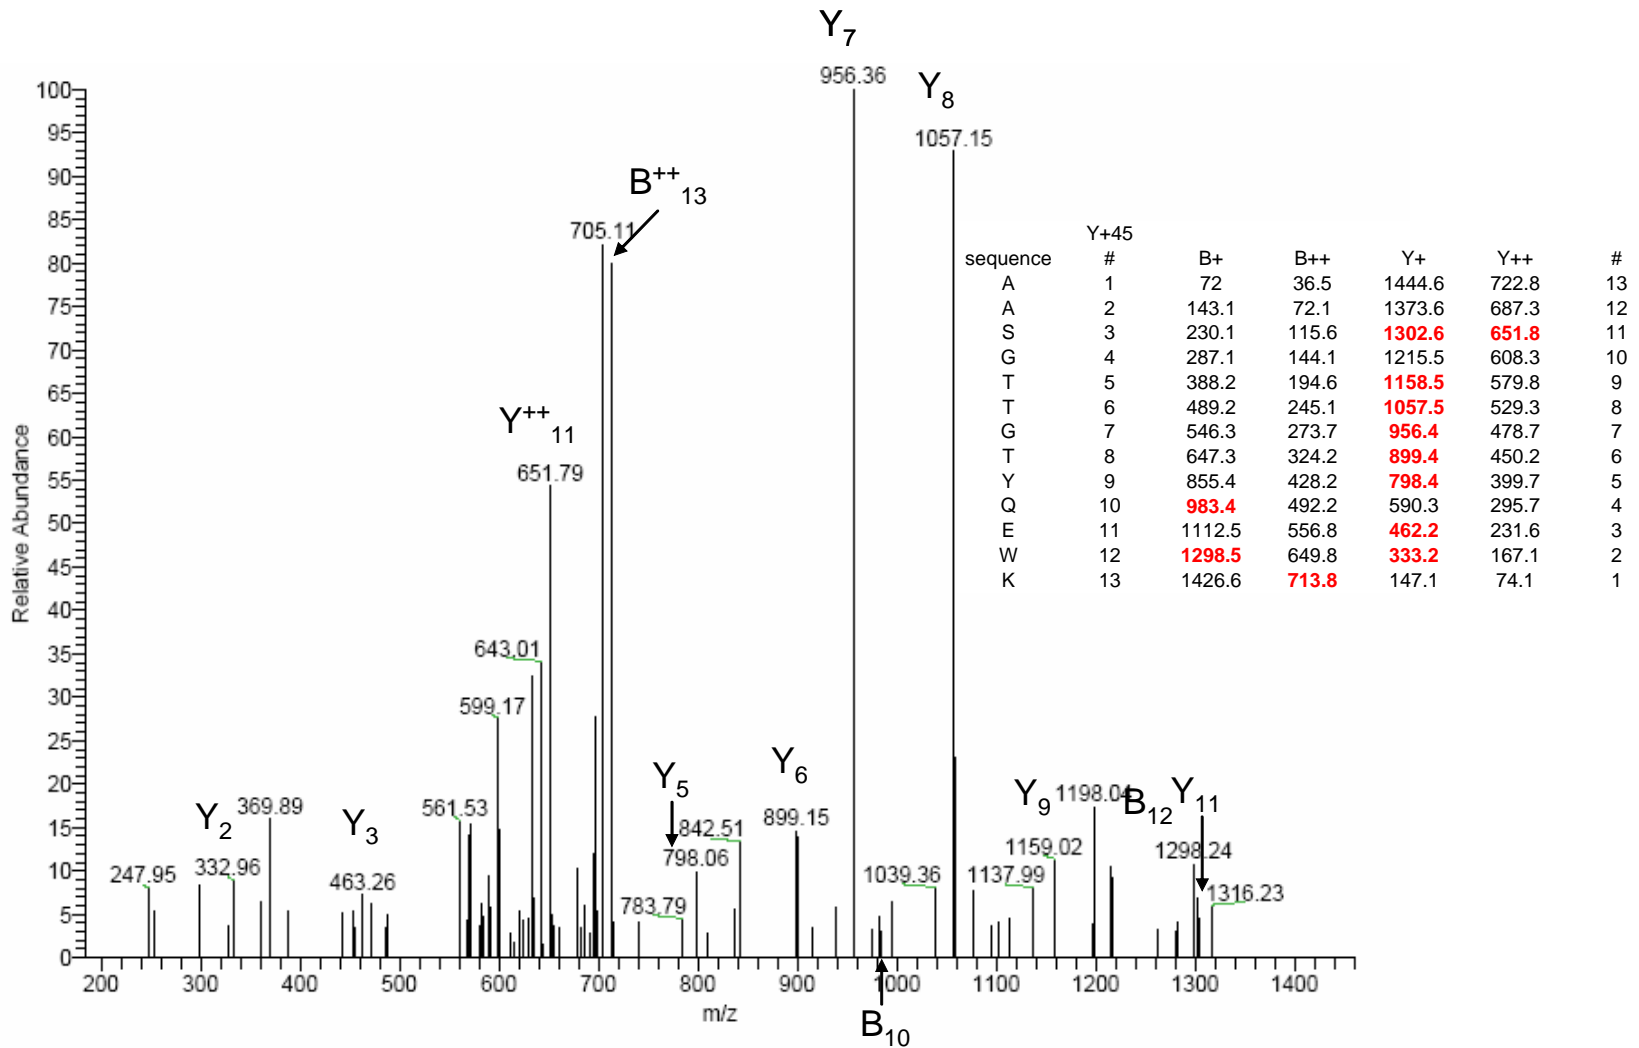

Figure 12: MS/MS spectrum of nitrated peptide obtained from *in vivo* LDL<sup>-</sup> apoB-100 protein. Mass of peptides observed is in red upon ionization and annotated on the chart. Spectra were obtained from bioworks browser.

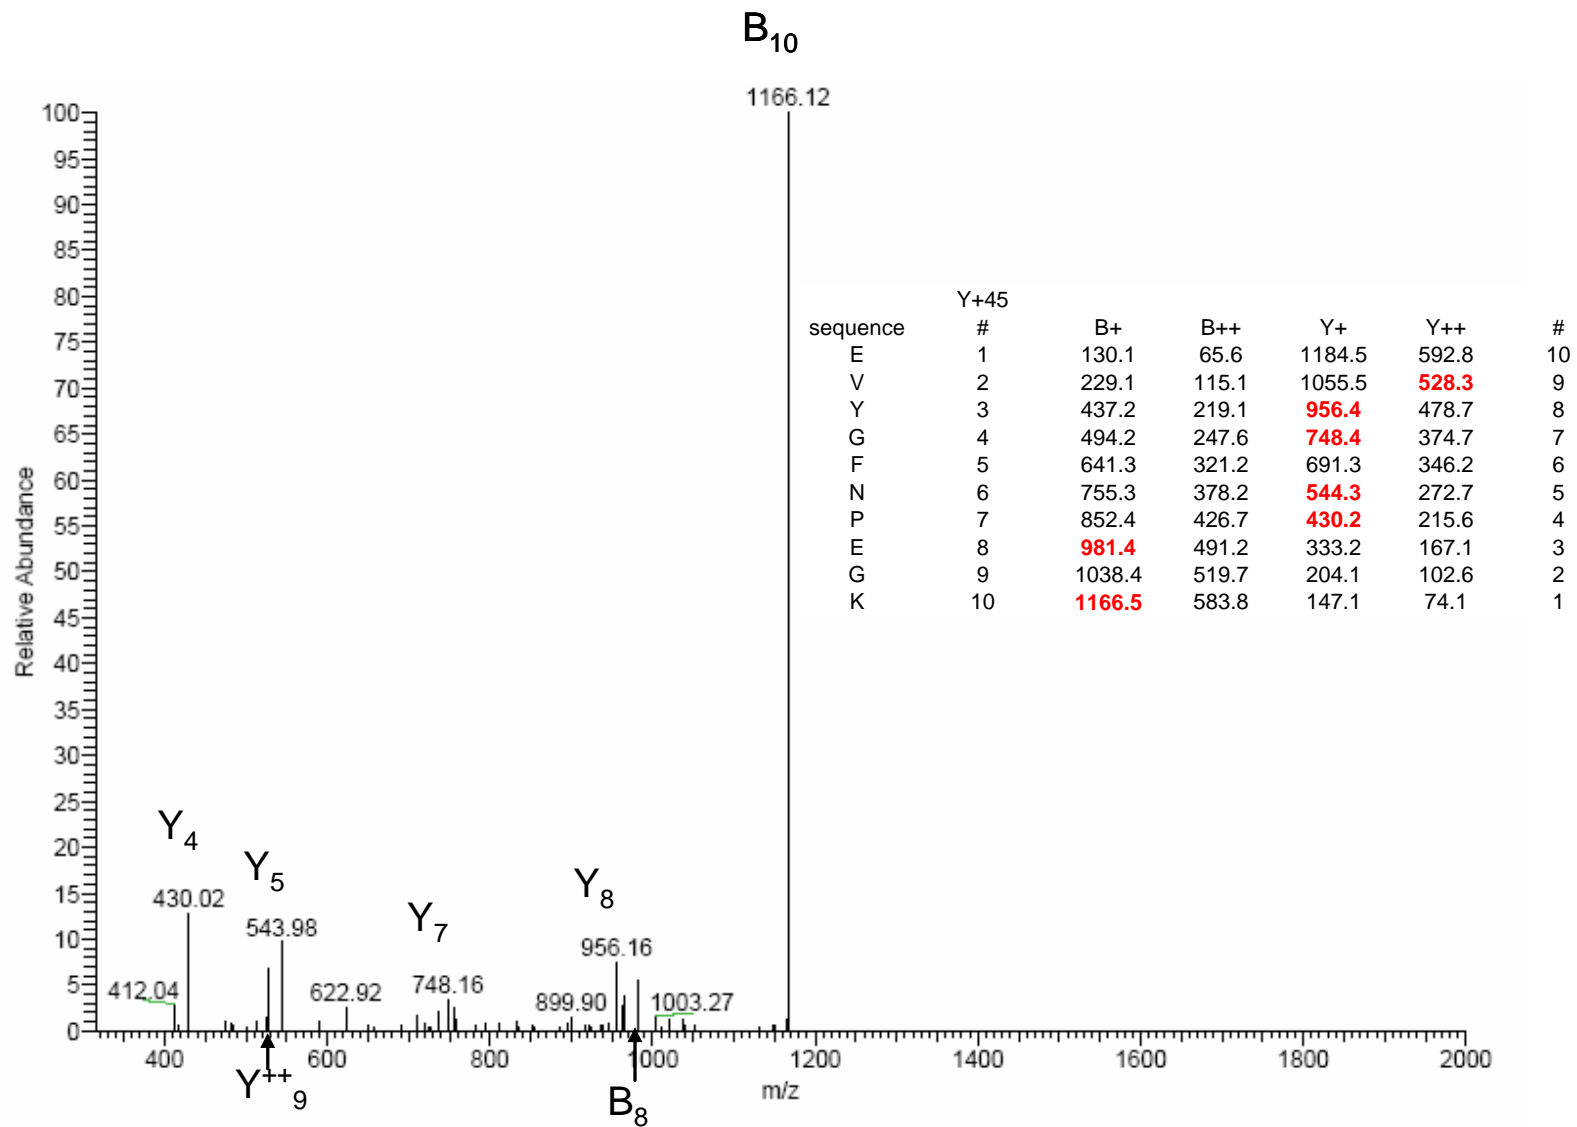

Figure 13: MS/MS spectrum of nitrated peptide obtained from 100  $\mu\text{M}$  ONOO<sup>-</sup>-treated LDL apoB-100 protein. Mass of peptides observed is in red upon ionization and annotated on the chart. Spectra were obtained from bioworks browser.

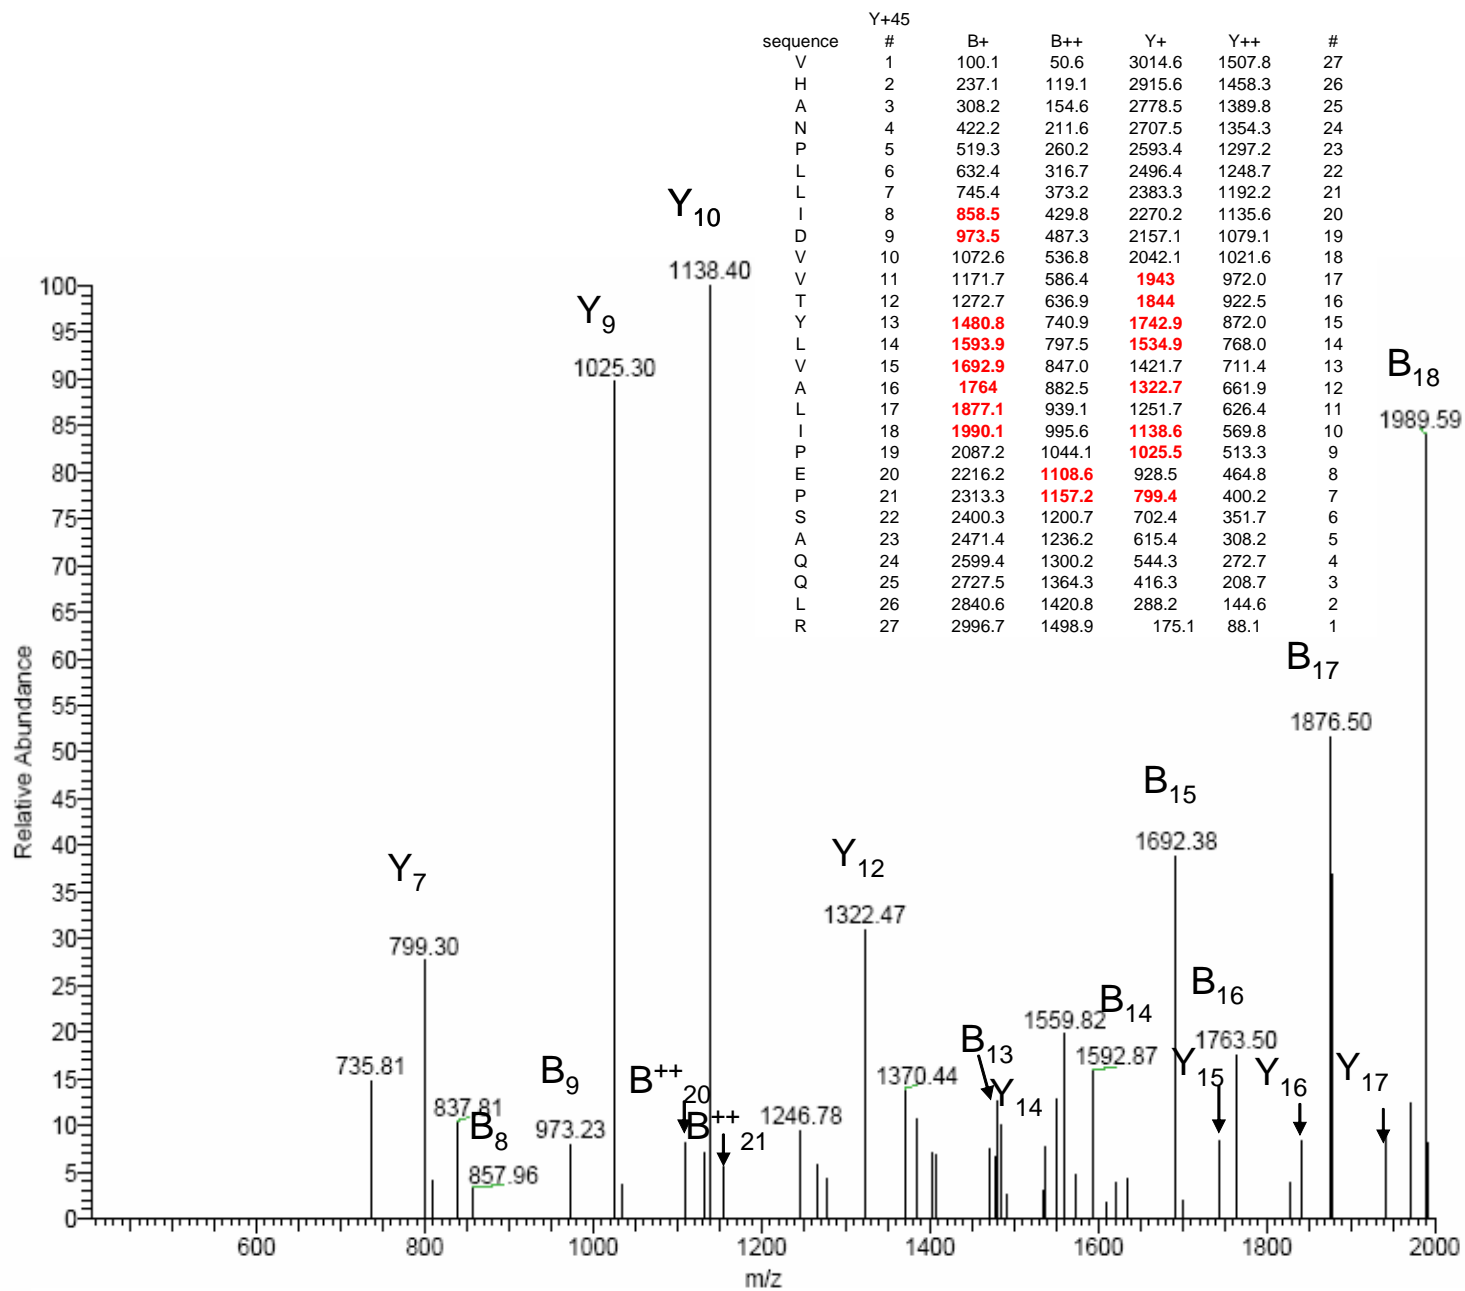

Figure 14: MS/MS spectrum of nitrated peptide obtained from 100  $\mu\text{M}$  ONOO<sup>-</sup>-treated LDL apoB-100 protein. Mass of peptides observed is in red upon ionization and annotated on the chart. Spectra were obtained from bioworks browser.

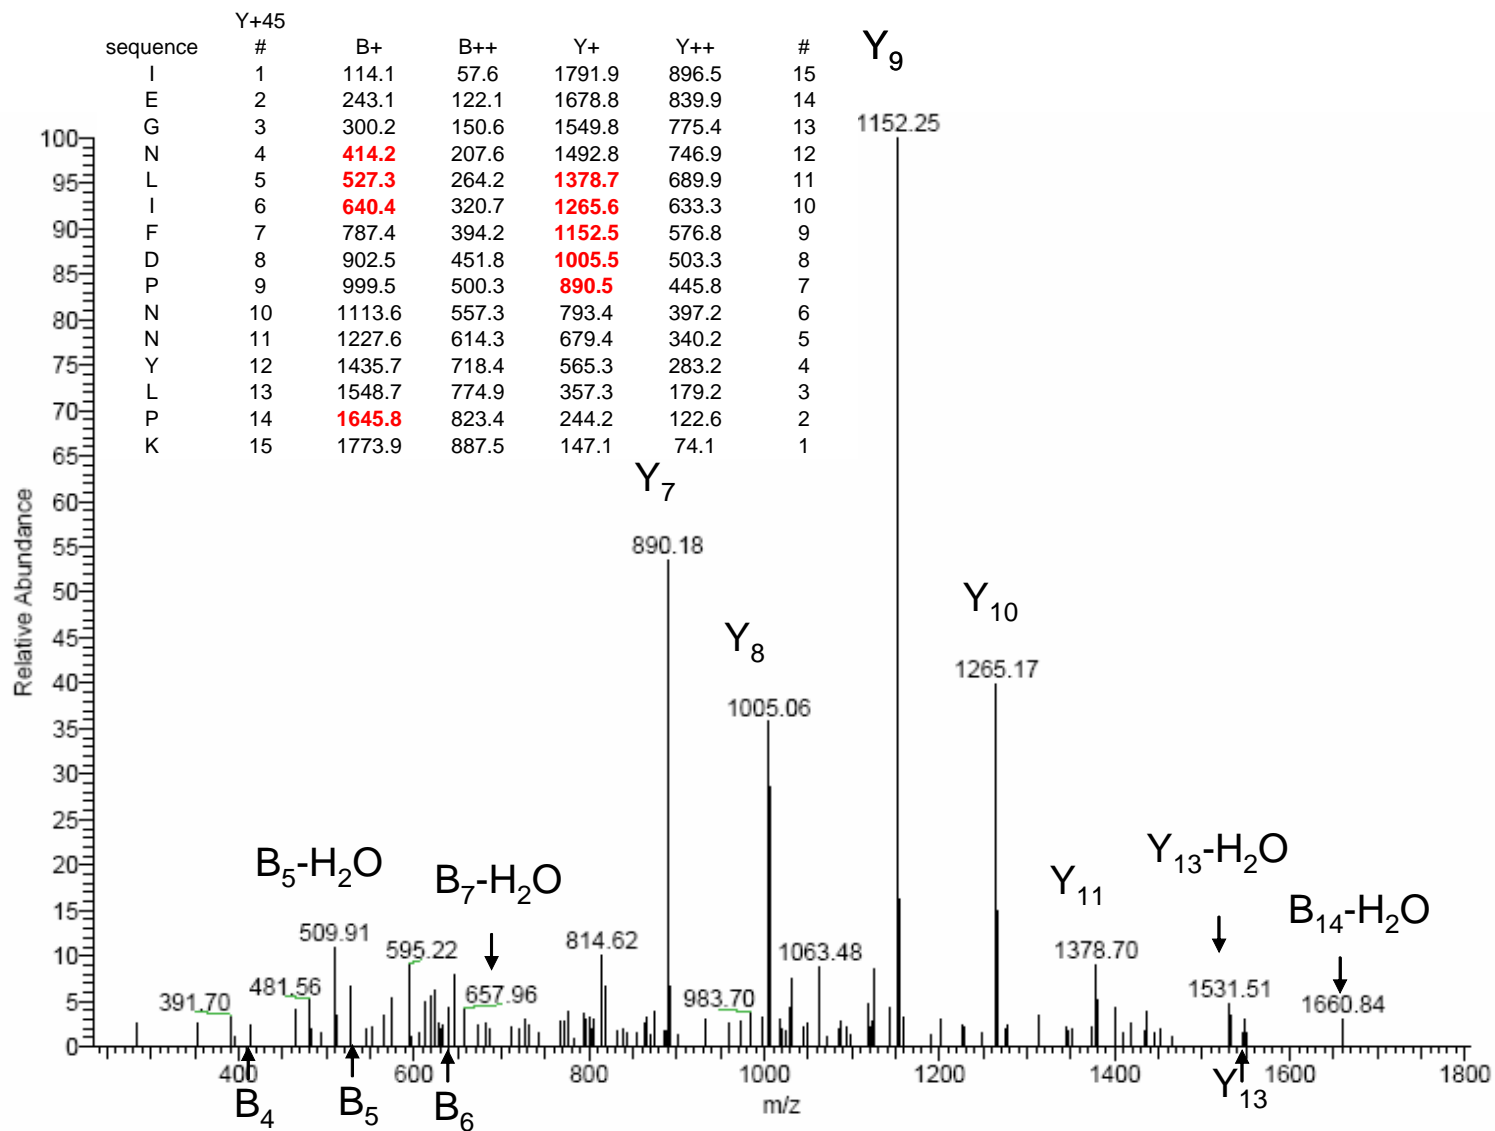

Figure 15: MS/MS spectrum of nitrated peptide obtained from 100  $\mu\text{M}$  ONOO<sup>-</sup>-treated LDL apoB-100 protein. Mass of peptides observed is in red upon ionization and annotated on the chart. Spectra were obtained from bioworks browser.

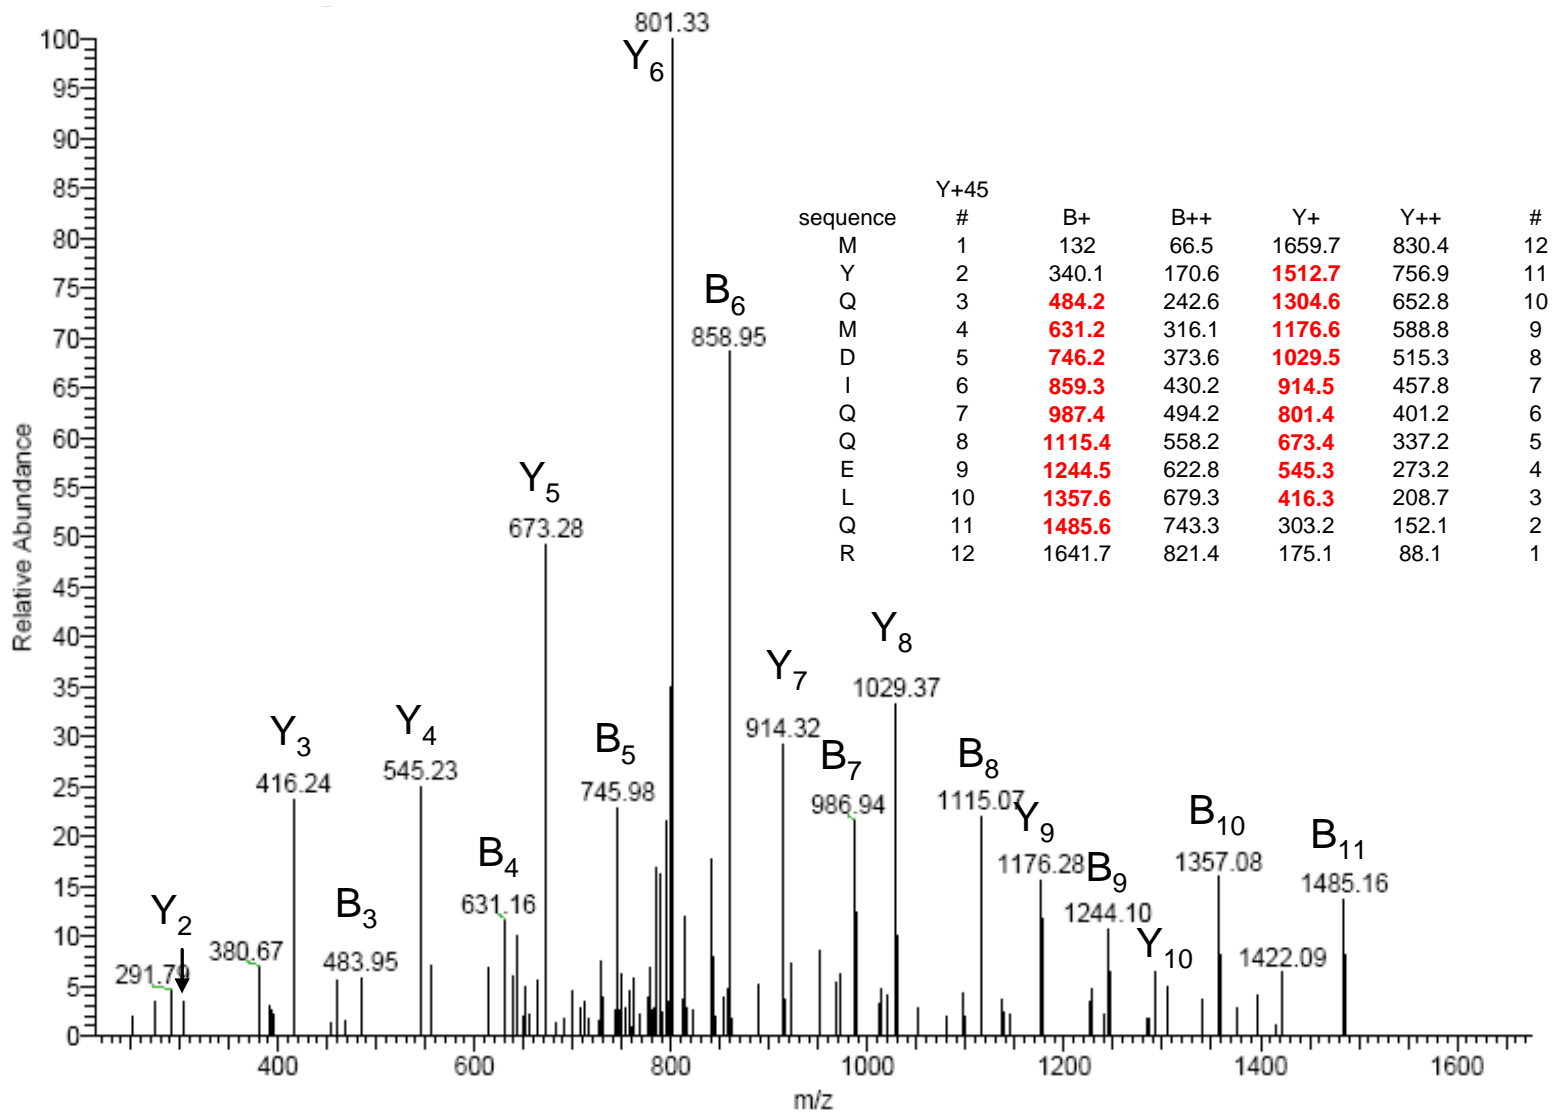

Figure 16: MS/MS spectrum of nitrated peptide obtained from 100  $\mu\text{M}$  ONOO<sup>-</sup>-treated LDL apoB-100 protein. Mass of peptides observed is in red upon ionization and annotated on the chart. Spectra were obtained from bioworks browser.



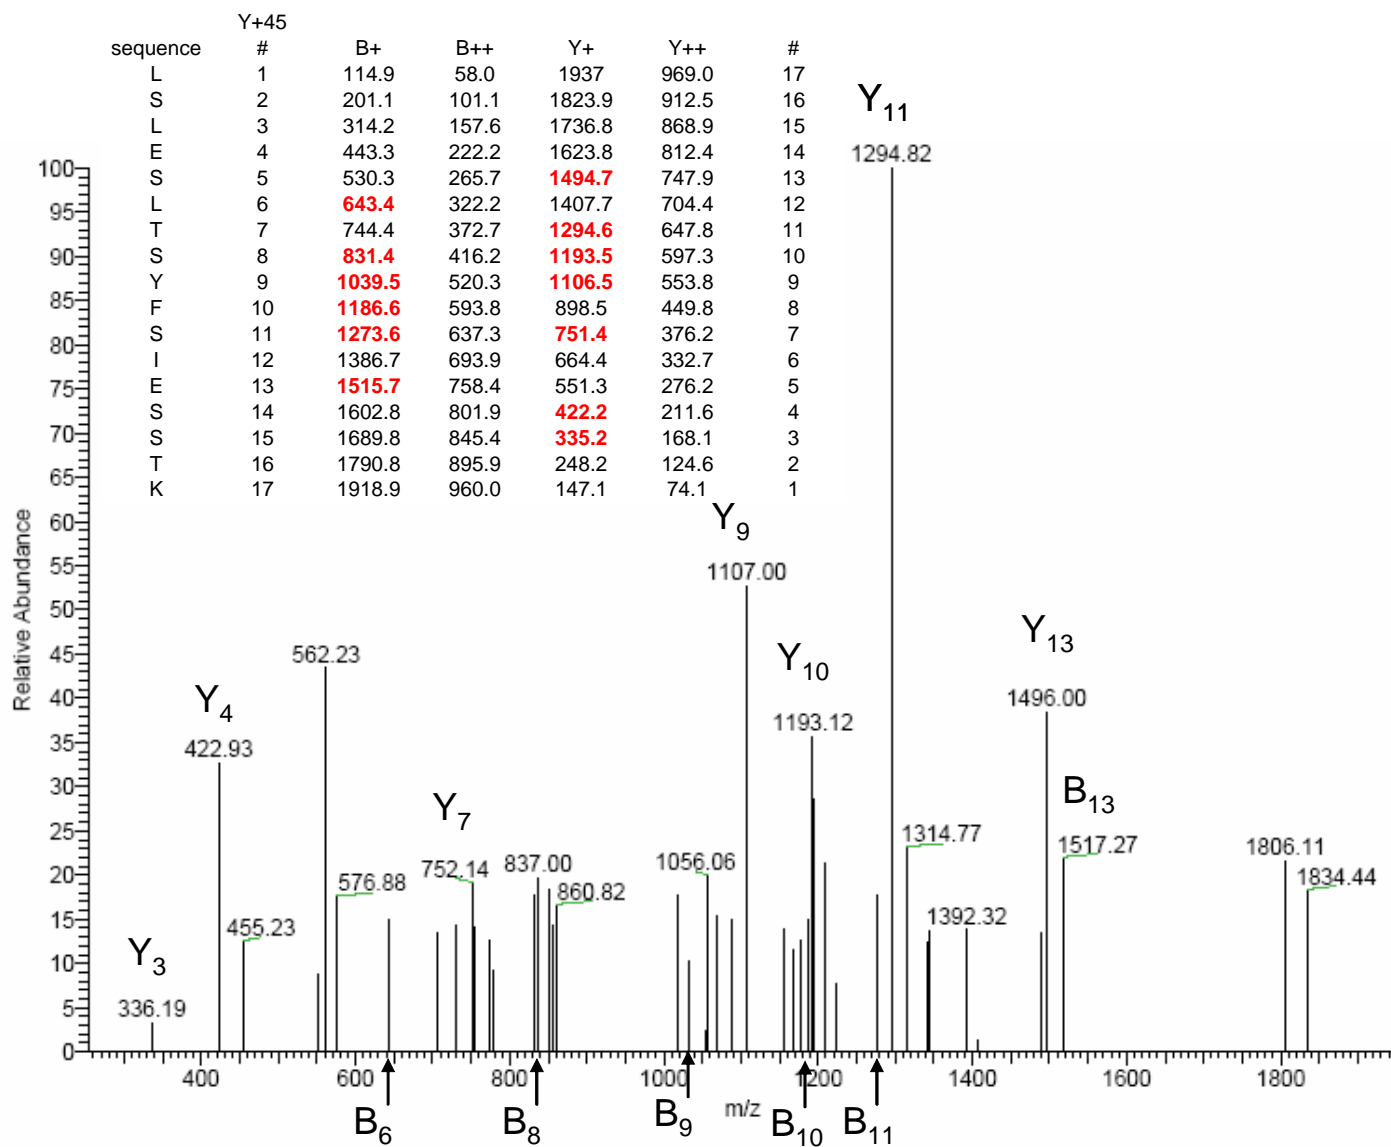

Figure 17: MS/MS spectrum of nitrated peptide obtained from 100  $\mu\text{M}$   $\text{ONOO}^-$ -treated LDL apoB-100 protein. Mass of peptides observed is in red upon ionization and annotated on the chart. Spectra were obtained from bioworks browser.

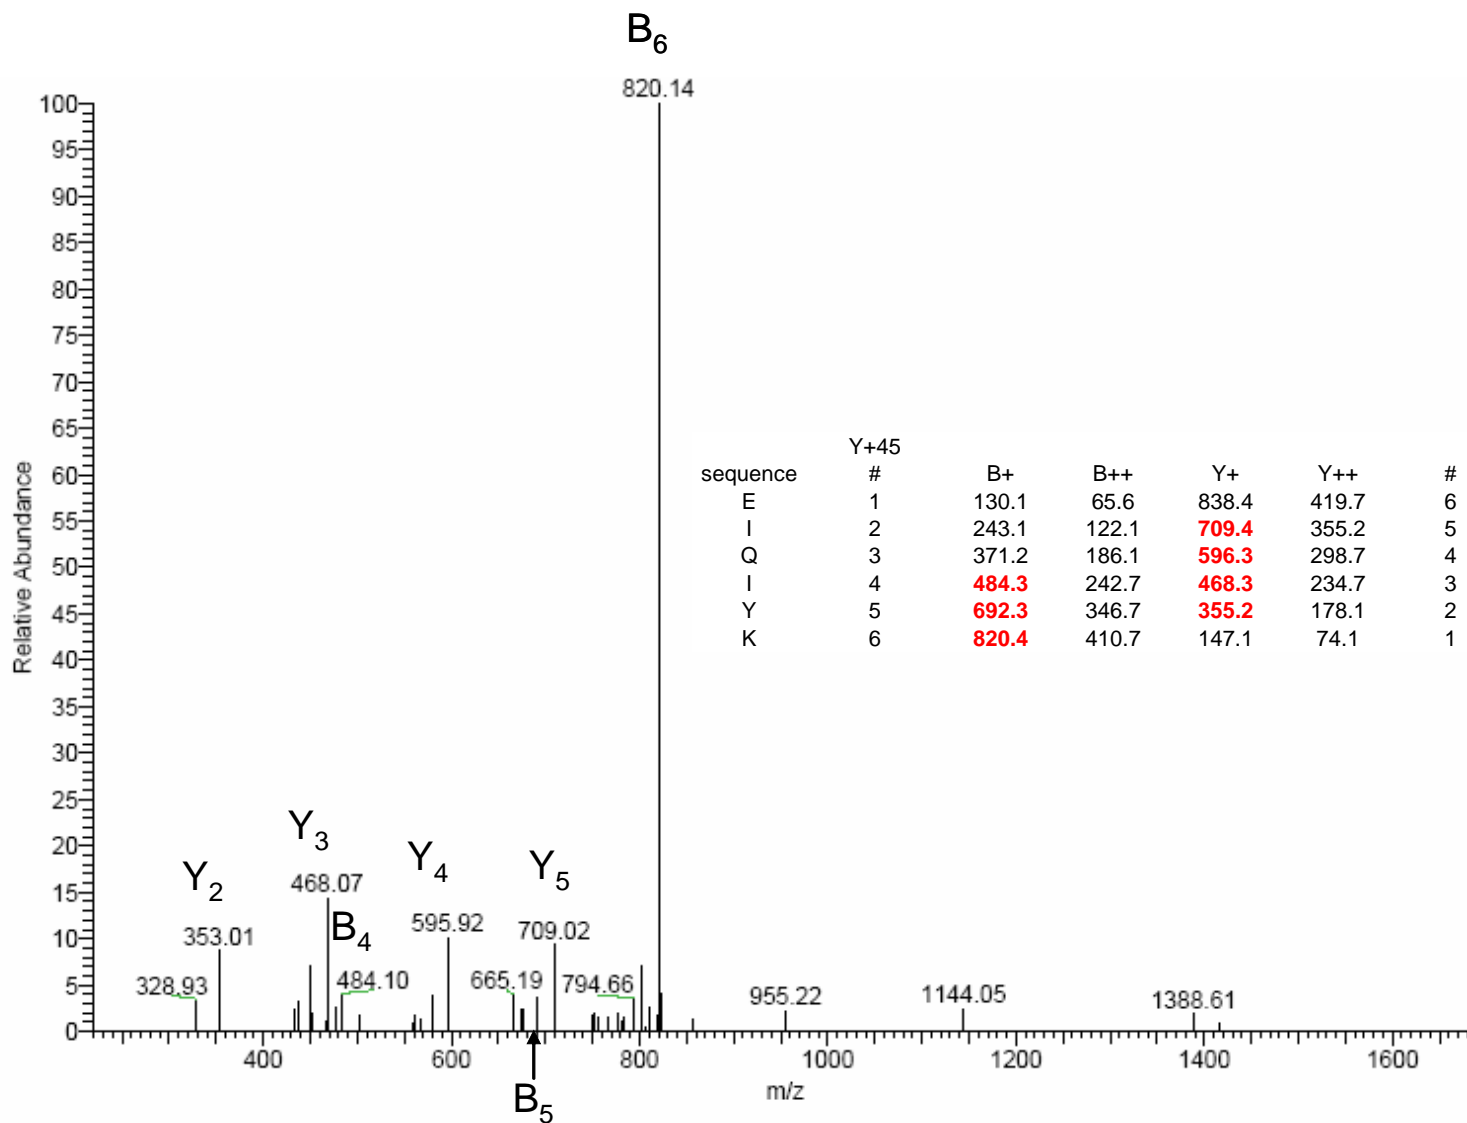

Figure 18: MS/MS spectrum of nitrated peptide obtained from 100  $\mu\text{M}$   $\text{ONOO}^-$ -treated LDL apoB-100 protein. Mass of peptides observed is in red upon ionization and annotated on the chart. Spectra were obtained from bioworks browser.

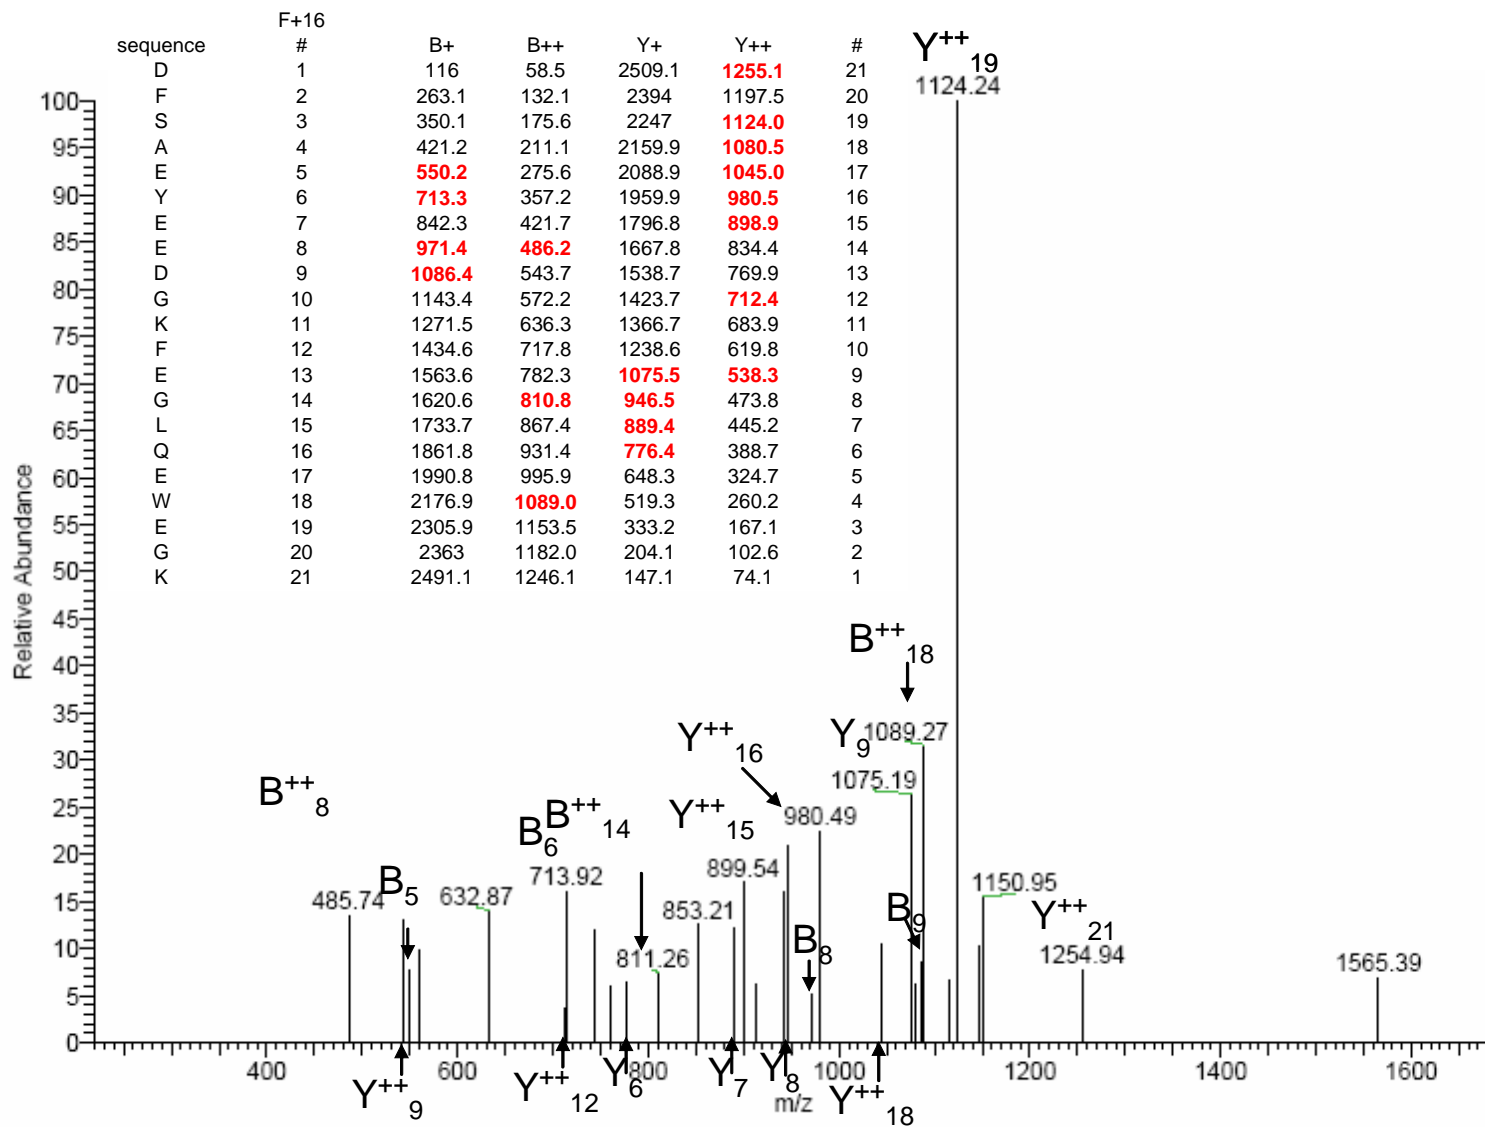

Figure 19: MS/MS spectrum of nitrated peptide obtained from 100  $\mu\text{M}$   $\text{ONO}_2^-$ -treated LDL apoB-100 protein. Mass of peptides observed is in red upon ionization and annotated on the chart. Spectra were obtained from bioworks browser.

| sequence | Y+45 # | B+           | B++          | Y+            | Y++   | #  |
|----------|--------|--------------|--------------|---------------|-------|----|
| Y        | 1      | 209.1        | 105.1        | 1457.7        | 729.4 | 11 |
| H        | 2      | <b>346.1</b> | 173.6        | <b>1249.6</b> | 625.3 | 10 |
| W        | 3      | <b>532.1</b> | 266.6        | <b>1112.6</b> | 556.8 | 9  |
| E        | 4      | <b>661.3</b> | 331.2        | <b>926.5</b>  | 463.8 | 8  |
| H        | 5      | <b>798.3</b> | 399.7        | <b>797.5</b>  | 399.3 | 7  |
| T        | 6      | <b>899.4</b> | 450.2        | <b>660.4</b>  | 330.7 | 6  |
| G        | 7      | 956.4        | 478.7        | <b>559.4</b>  | 280.2 | 5  |
| L        | 8      | 1069.5       | 535.3        | 502.3         | 251.7 | 4  |
| T        | 9      | 1170.5       | 585.8        | 389.3         | 195.2 | 3  |
| L        | 10     | 1283.6       | 642.3        | <b>288.2</b>  | 144.6 | 2  |
| R        | 11     | 1439.7       | <b>720.4</b> | 175.1         | 88.1  | 1  |

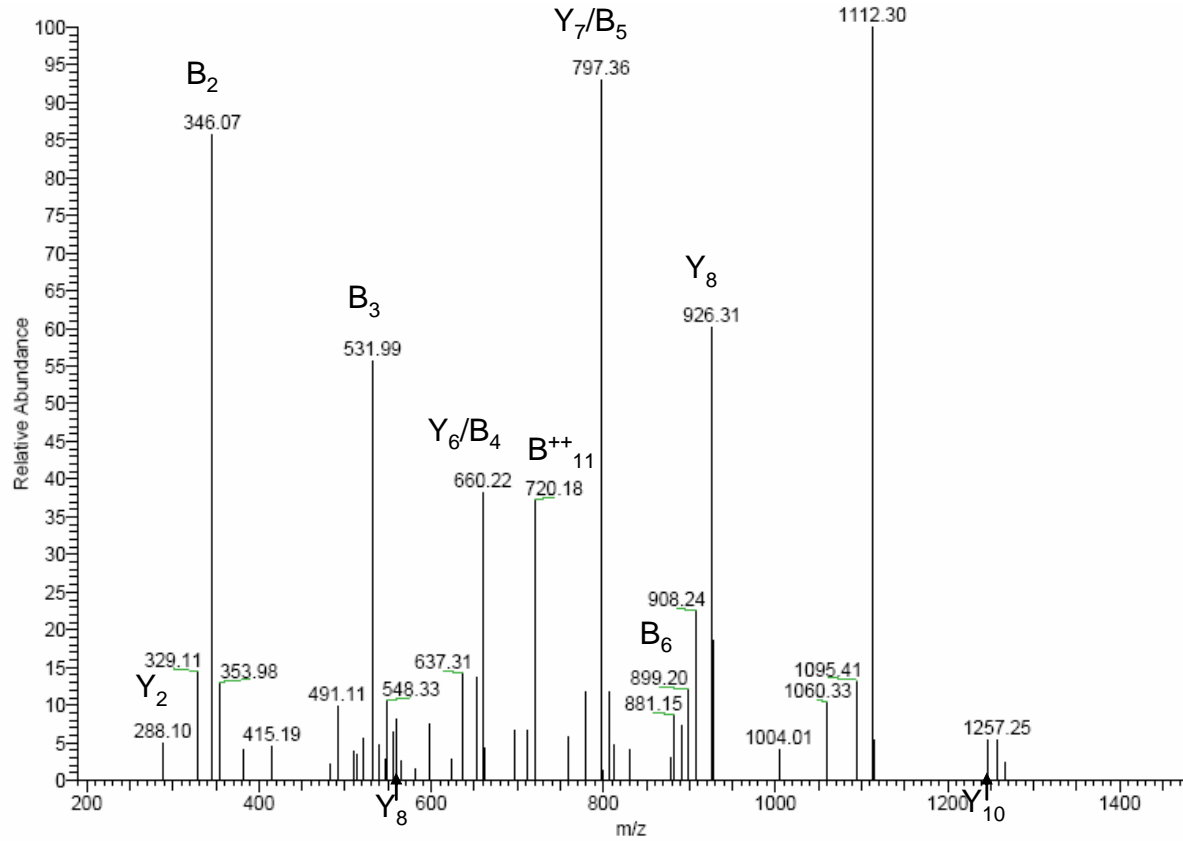

Figure 20: MS/MS spectrum of nitrated peptide obtained from 100  $\mu$ M ONOO<sup>-</sup>-treated LDL apoB-100 protein. Mass of peptides observed is in red upon ionization and annotated on the chart. Spectra were obtained from bioworks browser.
